# Supplementary material for: Gold nanoparticles functionalized with 2,6-dimercaptopurine for sensitive and selective colorimetric determination of cadmium(ii) in food, biological and environmental samples
Source: Royal Society of Chemistry journal article supplement (doi:10.1039/c7ay01871a), 2017-01-01
Supplement: c7ay01871a1.pdf [file c7ay01871a1.pdf]

# Gold nanoparticles functionalized with 2, 6-dimercaptopurine for sensitive and selective colorimetric determination of cadmium (II) in food, biology and environment samples

M. H. Hu<sup>a</sup>, W. H. Huang<sup>a</sup>, L. L. Suo<sup>a</sup>, L. H. Zhou<sup>a</sup>, L. F. Ma<sup>a</sup> and H. F. Zhu<sup>\*a</sup>

<sup>a</sup> Physical and Chemical Department, Nanchang Centre for Disease Control and Prevention, Nanchang, 330038, People's Republic of China.

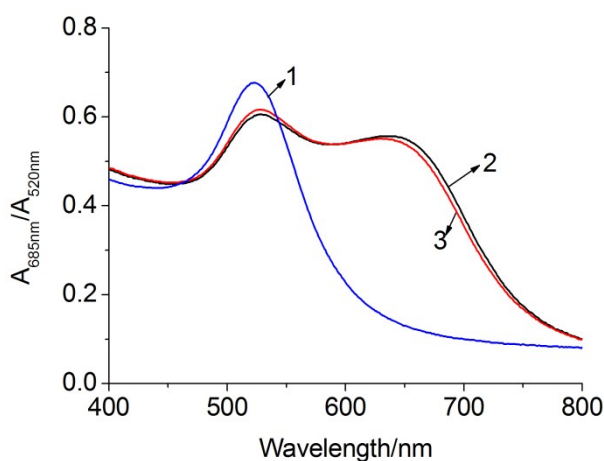

**Fig. S1** UV-Vis absorption spectra of naked AuNPs (1), DMP-AuNPs in the presence of cadmium (1.5  $\mu$ M) (2) and DMP-AuNPs in the presence of cadmium (1.5  $\mu$ M) through centrifugation (3)

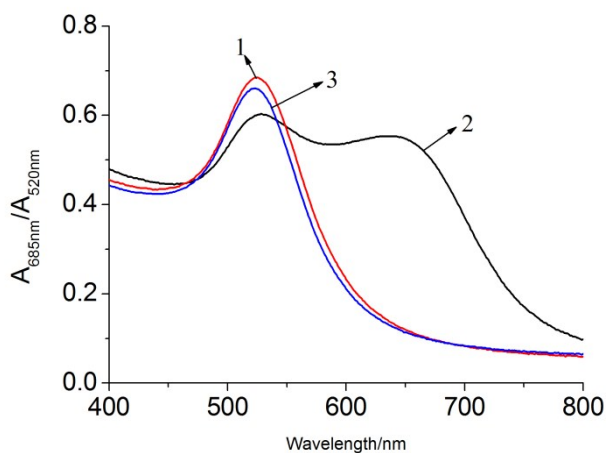

**Fig. S2** Absorption spectra of DMP-AuNPs (1), DMP-AuNPs + Cd<sup>2+</sup> (1.5 $\mu$ M) (2) and DMP-AuNPs + Cd<sup>2+</sup> (1.5 $\mu$ M) (3) in the presence of the chelating agent EDTA.
